# Supplementary material
Source: HighWire-hosted journal article supplement (https://qualitysafety.bmj.com/content/31/9/670)

**Appendix 2: Rate of Severe Maternal Morbidity by Race and Ethnicity  
October 2015 - Feb 2019**

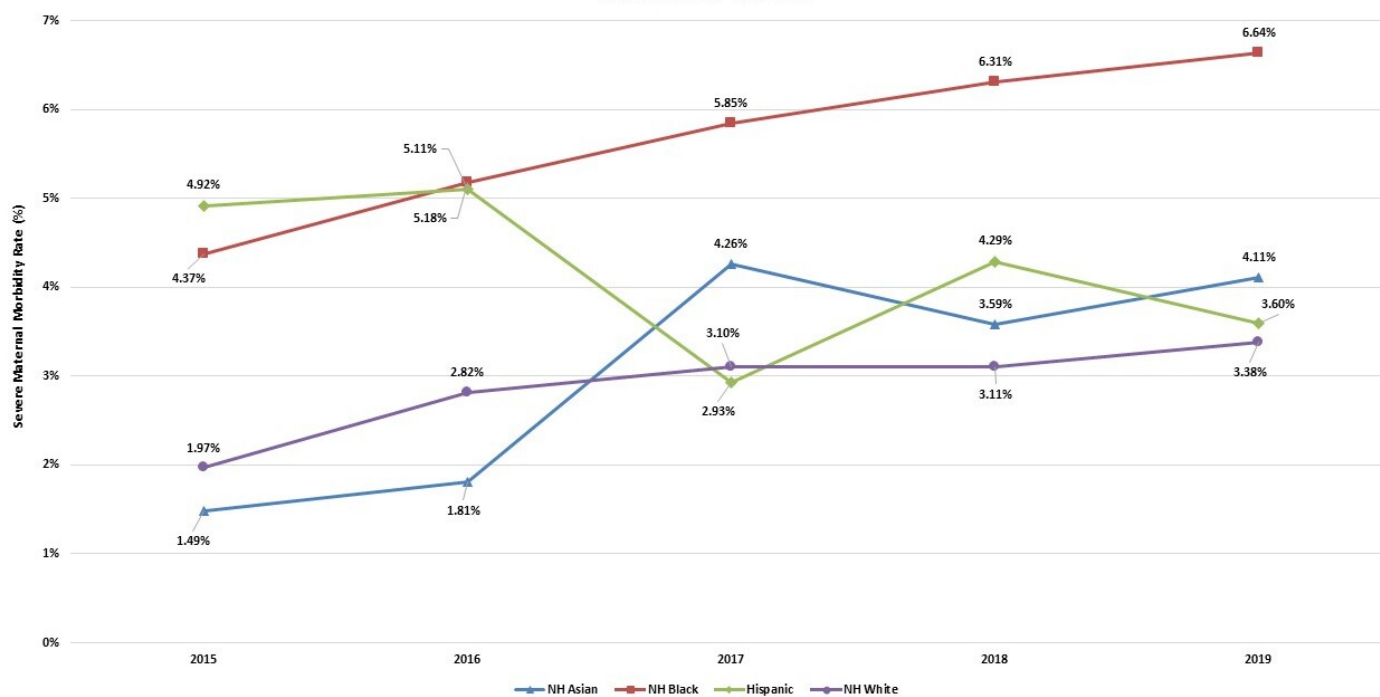

Supplement: inline-supplementary-material-2 [file inline-supplementary-material-2.pdf]
